# Supplementary material for: Understanding the effects of the co-sensitizing ratio on the surface potential, electron injection efficiency, and Förster resonance energy transfer
Source: Royal Society of Chemistry journal article supplement (doi:10.1039/c9cp06028f), 2020-01-01
Supplement: c9cp06028f1.pdf [file c9cp06028f1.pdf]

## **Electronic Supplementary Information for**

### **Understanding the effect of the co-sensitizing ratio on the surface potential, electron injection efficiency, and Förster resonance energy transfer**

*Jie Yang<sup>a</sup>, Xing-Liang Peng<sup>b</sup>, Zhu-Zhu Sun<sup>c</sup>, Shuai Feng<sup>d</sup>, Wei-Lu Ding<sup>\*e</sup>, Hong-Yan He<sup>e</sup>, and Ze-Sheng Li<sup>\*a</sup>*

a Beijing Key Laboratory of Photoelectronic/Electrophotonic Conversion Materials, Key Laboratory of Cluster Science of Ministry of Education, School of Chemistry, Beijing Key Laboratory for Chemical Power Source and Green Catalysis, School of Chemistry, Beijing Institute of Technology, Beijing 100081, China

b MOE Key Laboratory of Organic OptoElectronics and Molecular Engineering, Department of Chemistry, Tsinghua University, Beijing 100084, People's Republic of China

c Energy-Saving Building Materials Innovative Collaboration Center of Henan Province, Xinyang Normal University, Xinyang, 464000, China

d College of Chemistry and Chemical Engineering, Taishan University, Taian, 271021, China

e Beijing Key Laboratory of Ionic Liquids Clean Process, CAS Key Laboratory of Green Process and Engineering, State Key Laboratory of Multiphase Complex Systems, Institute of Process Engineering, Chinese Academy of Sciences, Beijing 100190, China

#### **Corresponding Author**

\* Wei-Lu Ding (wlding@ipe.ac.cn)

\* Ze-Sheng Li (zeshengli@bit.edu.cn)

## Contents

|                                                                                                                               |     |
|-------------------------------------------------------------------------------------------------------------------------------|-----|
| <b>Orientation factor</b> .....                                                                                               | S3  |
| <b>News–Anderson model</b> .....                                                                                              | S4  |
| <b>Reorganization energy</b> .....                                                                                            | S5  |
| <b>Fig. S1.</b> The different configurations in Model 1 .....                                                                 | S6  |
| <b>Fig. S2.</b> The different configurations in Model 2.....                                                                  | S7  |
| <b>Fig. S3.</b> The tilt angle between the axes of the dipole moment and the surface normal of the TiO <sub>2</sub> film..... | S8  |
| <b>Fig. S4.</b> The unoccupied molecular orbitals of whole adsorbents of Model 1 and 2.....                                   | S9  |
| <b>Fig. S5.</b> The excitation energies of IQ21 and emission energies of S2 vs. simulated time span.....                      | S10 |
| <b>Fig. S6.</b> Co-sensitizing models on grid of Ti atoms for Model 3 and 4.....                                              | S11 |
| <b>Fig. S7.</b> The different configurations in Model 3.....                                                                  | S12 |
| <b>Fig. S8.</b> The different configurations in Model 4.....                                                                  | S13 |
| <b>Fig. S9.</b> Orientation factor and donor-acceptor distance.....                                                           | S14 |
| <b>Fig. S10.</b> The scaled FRET rate of varied D-A couples.....                                                              | S15 |
| <b>Table S1.</b> The vertical excited state/wavelength tested by different functionals.....                                   | S16 |
| <b>Table S2.</b> The distances between the O of carboxyl of adsorbent and Ti on the surface.....                              | S17 |
| <b>Table S3</b> Adsorption density and adsorption energy in Models 3 and 4.....                                               | S18 |
| <b>Table S4</b> The surface dipole concentration and surface potential change in Models 3 and 4...                            | S19 |
| <b>Table S5</b> Electron injection, electron-hole recombination, electron injection efficiency in Models 3 and 4.....         | S20 |
| <b>Table S6</b> FRET geometrical parameters in Models 3 and 4.....                                                            | S21 |

# Theoretical background

## 1 Orientation factor

The orientation factor  $\kappa^2$  is expressed by the followed equation:<sup>1-3</sup>

$$\kappa^2 = (\sin \alpha_D \sin \alpha_A \cos \beta_{DA} - 2 \cos \alpha_D \cos \alpha_A)^2$$

$$\alpha_D = \arccos(\sin \theta_D \sin \phi_D) \quad (2)$$

$$\alpha_A = \arccos(\sin \theta_A \sin \phi_A)$$

$$\beta_{DA} = \arctan(\tan \theta_D \cos \phi_D) - \arctan(\tan \theta_A \cos \phi_A)$$

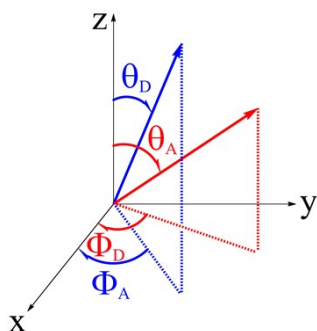

**Scheme S1.** Angles  $\theta$  and  $\Phi$  define the relative orientation of D-A couple.

where the angles  $\theta$  and  $\Phi$  define the relative orientation between the two interacting dipole moments. Notably, the  $\kappa^2$  can vary from 0 to 4 ( $\kappa^2 = 0, 1, 4$  upon the transition dipole moment of energy donor and acceptor is vertical, parallel, and end to end, respectively, and  $\kappa^2 = 2/3$  of the random orientation).

## 2 Newns–Anderson model<sup>4</sup>

To obtain a relatively accurate electron-transfer time, Newns–Anderson approach was employed to compute the mixing of lowest unoccupied molecular orbital (LUMO) on sensitizer with the manifold virtue orbitals on TiO<sub>2</sub>. Accordingly, this mixing possesses a Lorentzian distribution:

$$\rho_{\text{LUMO}}(E) = \frac{1}{(E - E_{\text{LUMO(ads)}})^2 + \left(\frac{\hbar\Gamma}{2}\right)^2} \quad (3)$$

The broadening width  $\hbar\Gamma$  in Eq (3) is taken as the mean deviation of the LUMO (sensitizer) levels, and is defined as follows:

$$\hbar\Gamma = \sum_i p_i |\varepsilon_i - E_{\text{LUMO(ads)}}| \quad (4)$$

where  $E_{\text{LUMO(ads)}}$  is obtained by a weighted average:

$$E_{\text{LUMO(ads)}} = \sum_i p_i \varepsilon_i \quad (5)$$

where  $P_i$  and  $\varepsilon_i$  are the portion of  $i$ th molecular orbital (MO) for sensitizer and its corresponding MO energy, respectively. Simultaneously, the  $P_i$  is evaluated by:

$$P_i = \frac{\sum_j^{A \in \text{sen}} (c_{ij}^A)^2}{\sum_j^{A \in \text{sen@TiO}_2} (c_{ij}^A)^2} \quad (6)$$

### 3 Reorganization energy<sup>5</sup>

For the  $\chi$  is the inner reorganization energy which contains the solute part  $\chi^{\text{sen}}$  and the solvent part  $\chi^{\text{sol}}$

$$\chi = \frac{\chi_1^{\text{sen}} + \chi_2^{\text{sen}}}{2} \quad (7)$$

Accordingly, the  $\chi^{\text{sen}}$  can be defined as:

$$\chi_1^{\text{sen}} = E_{(Q_F)}^{\text{DBA}^*} - E_{(Q_r)}^{\text{DBA}^*} \quad (8)$$

$$\chi_2^{\text{sen}} = E_{(Q_r)}^{\text{DBA}^+} - E_{(Q_F)}^{\text{DBA}^+} \quad (9)$$

where the  $E_{(Q_P)}^{\text{DBA}^*}$ ,  $E_{(Q_r)}^{\text{DBA}^*}$ ,  $E_{(Q_r)}^{\text{DBA}^+}$  and  $E_{(Q_P)}^{\text{DBA}^+}$  contribute to the energies obtained from the excited state at the form of cation, energies of the relaxed excited state, the cationic energies calculated at the geometry of the excited state and the energies of the relaxed cationic state, respectively.

As for the content related to  $\chi^{\text{sol}}$ , it is expressed by:

$$\chi^{\text{sol}} = \Delta q \left( \frac{1}{2R_D} + \frac{1}{2R_A} - \frac{1}{R} \right) \left( \frac{1}{\epsilon_\infty} - \frac{1}{\epsilon_s} \right) \quad (10)$$

where  $R_D$ ,  $R_A$ ,  $R$  denote the radii of the donor, acceptor and the distances between their centers, and the  $\epsilon_\infty$  as well as the  $\epsilon_s$  stand for the optical frequency and static relative dielectric constants of the solvent, respectively. And  $\Delta q$  is the amount of the transferred electron.

## Figures

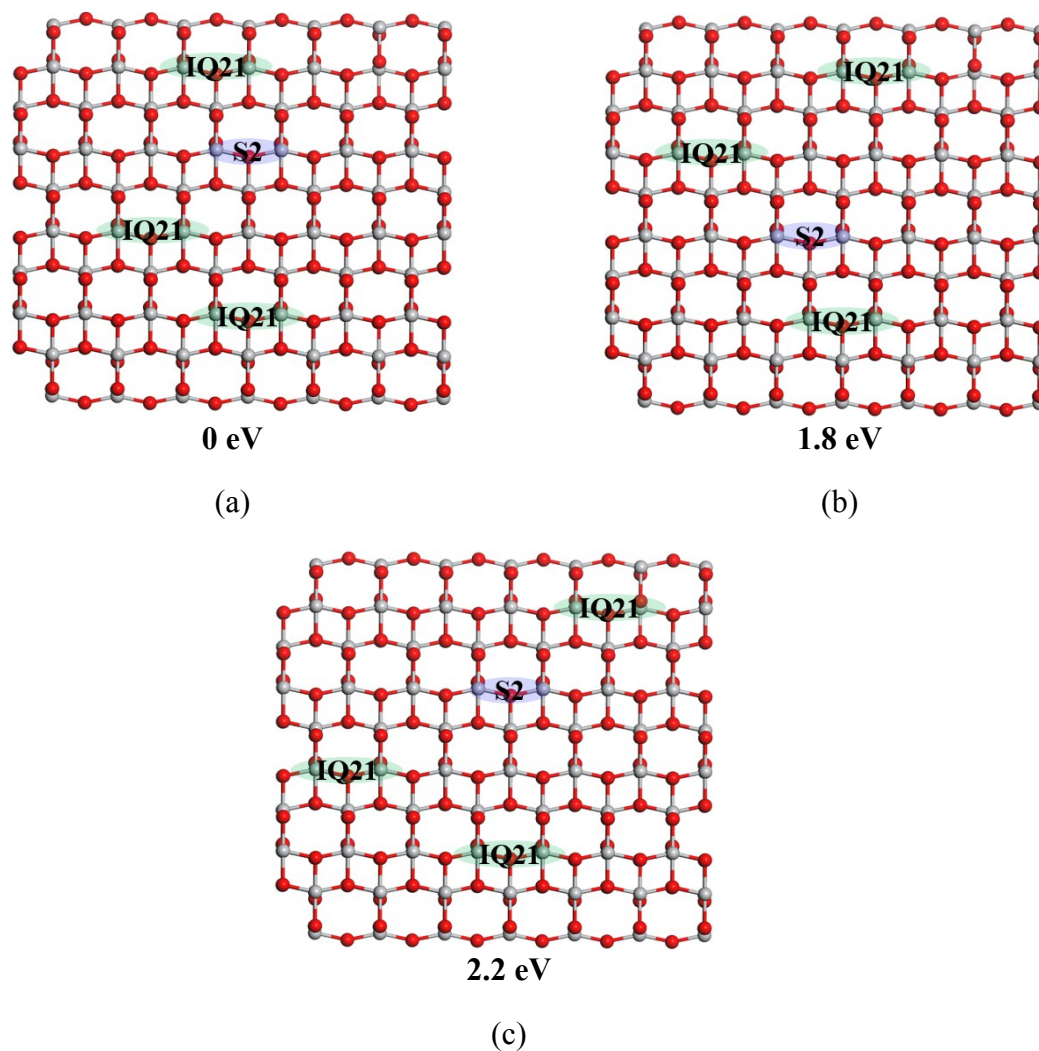

Model 1

**Fig. S1.** (a)-(c) The different configurations in Model 1 (the energy labelled in each configuration represents for the relative energy, and the green as well as purple present for the positions of IQ21 and S2, respectively).

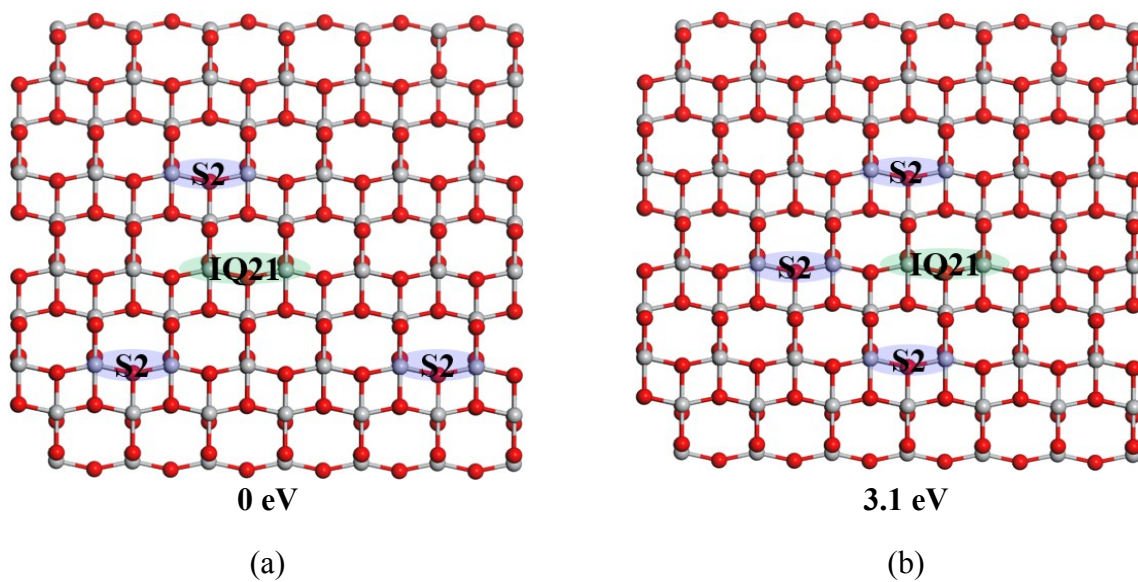

Model 2

**Fig. S2.** (a)-(b) The different configurations in Model 2 (the energy labelled in each configuration represents for the relative energy, and the green as well as purple present for the positions of IQ21 and S2, respectively).

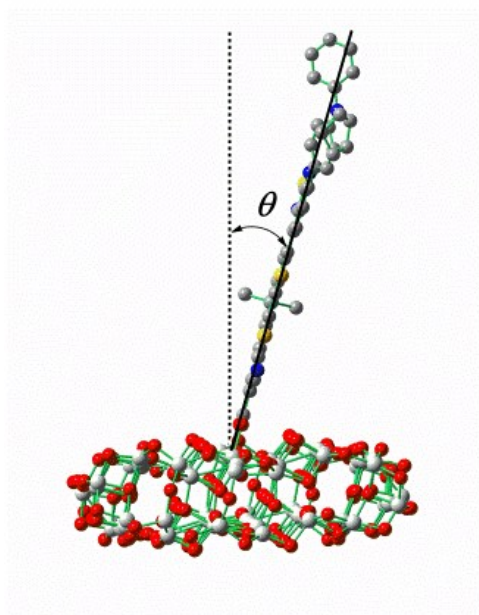

**Fig. S3.** The tilt angle ( $\theta$ ) between the axes of the dipole moment ( $\mu$ ) and the surface normal of the TiO<sub>2</sub> film.



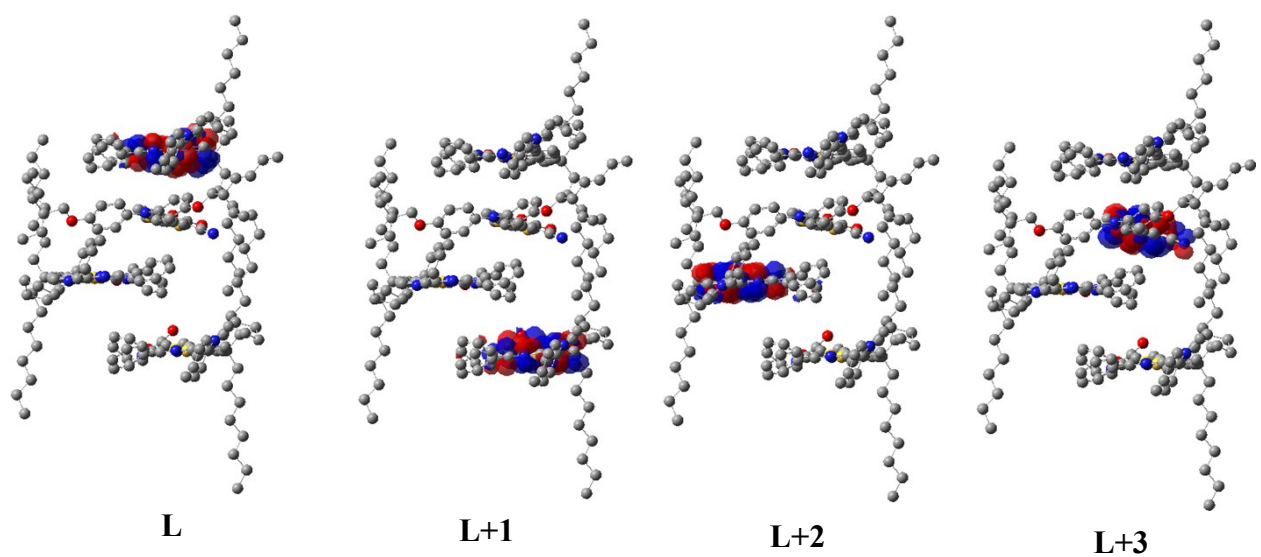

(a) Model 1 (IQ21/S2-3/1)

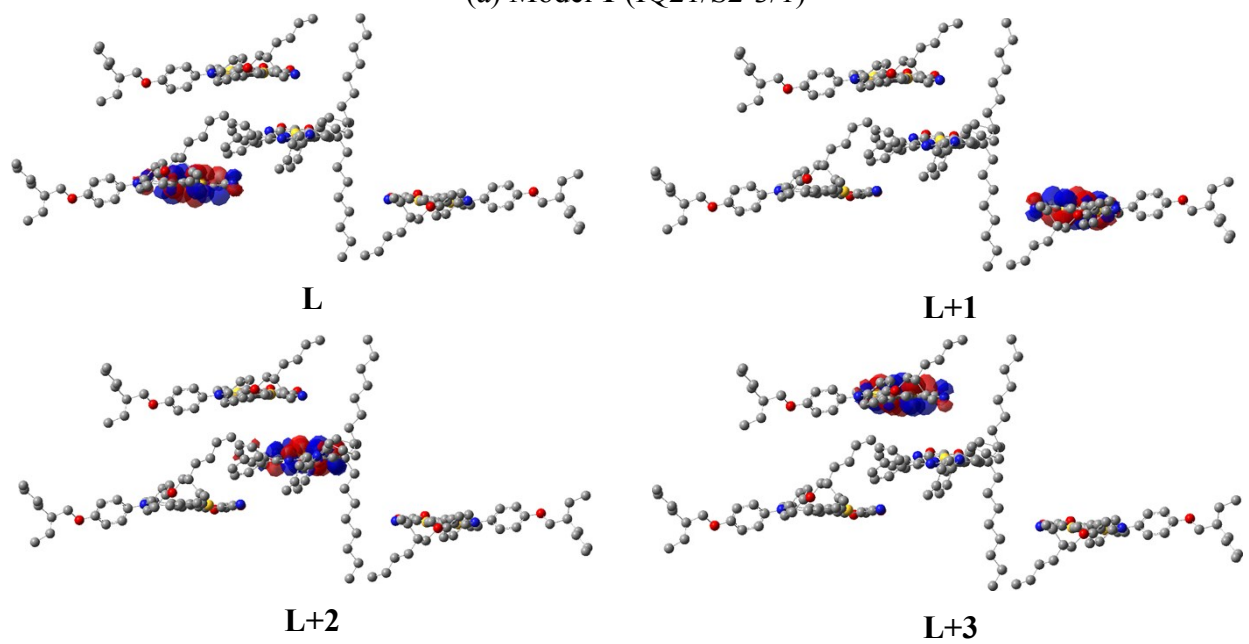

(b) Model 2 (S2/IQ21-3/1)

**Fig. S4.** The unoccupied molecular orbitals of whole adsorbents in Model 1 and 2.

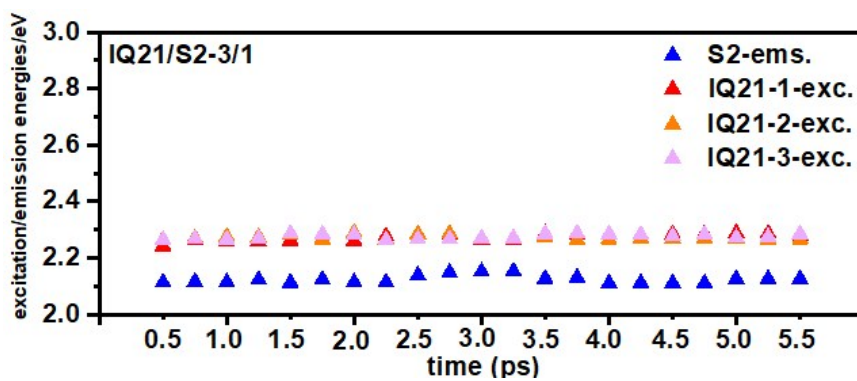

(a)

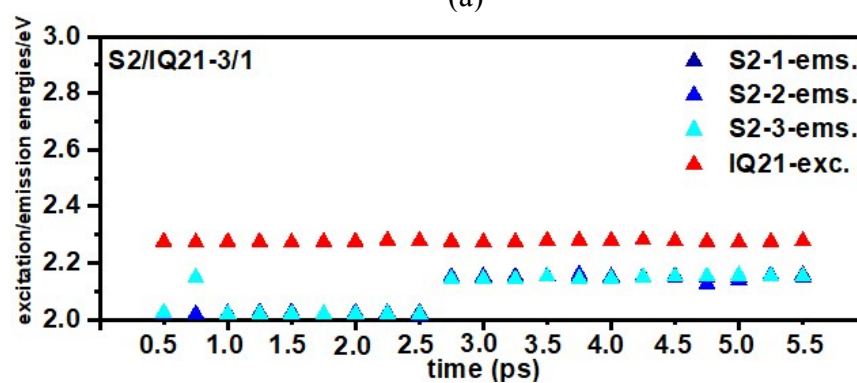

(b)

**Fig. S5.** The excitation energies of IQ21 and emission energies of S2 vs. simulated time span of 5.5 ps: (a) for Model 1 and (b) for Model 2.

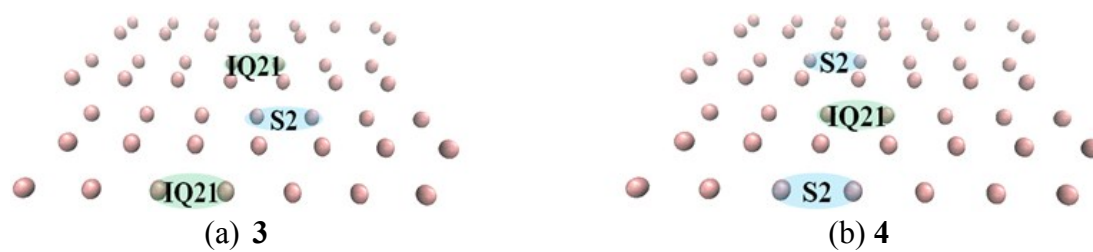

**Fig. S6.** Co-sensitizing models on grid of Ti atoms (a) for Model 3 (IQ21/S2-2/1) and (b) for Model 4 (S2/IQ21-2/1).

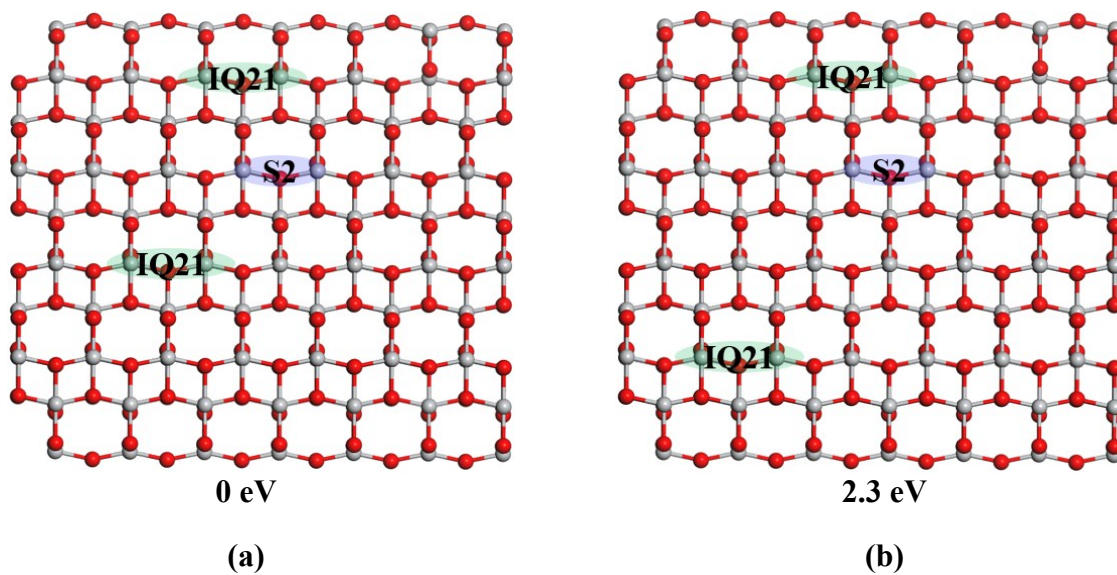

### Model 3

**Fig. S7.** (a)-(b) The different configurations in Model 3 (the energy labelled in each configuration represents for the relative energy, and the green as well as purple present for the positions of IQ21 and S2, respectively).

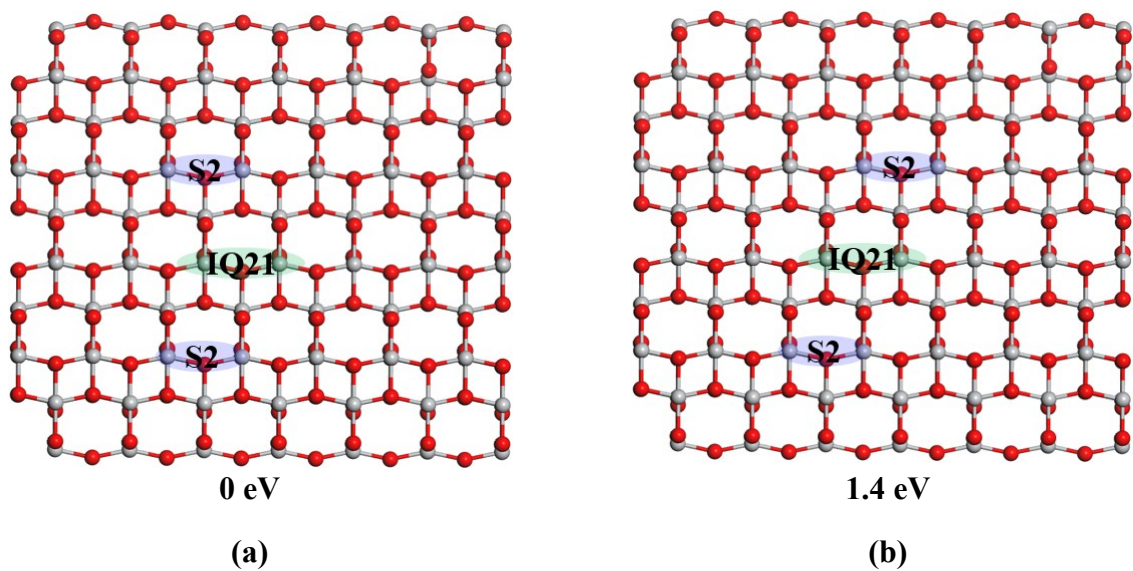

Model 4

**Fig. S8.** (a)-(b) The different configurations in Model 4 (the energy labelled in each configuration represents for the relative energy, and the green as well as purple present for the positions of IQ21 and S2, respectively).

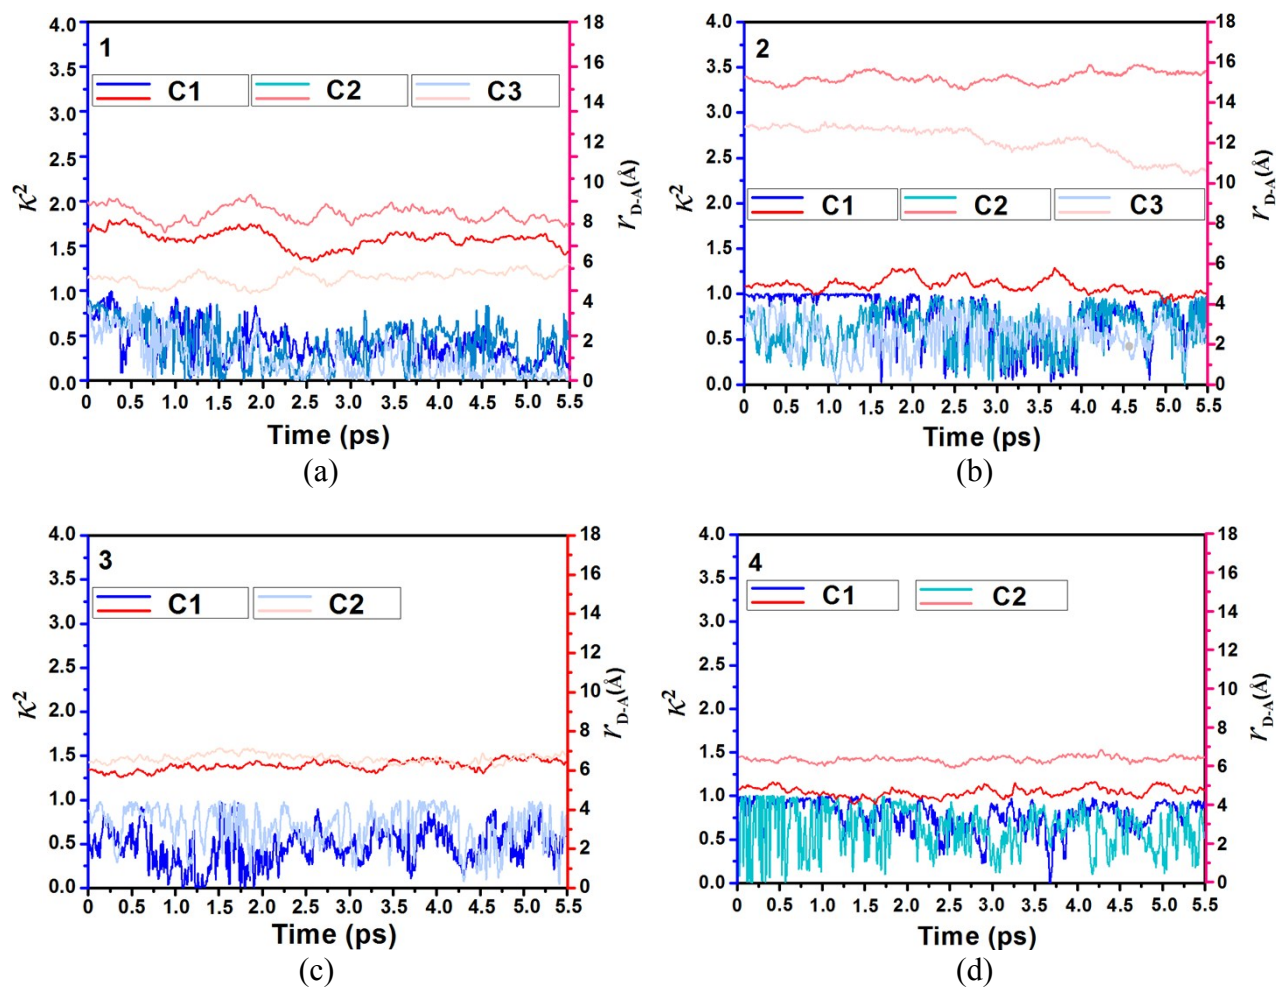

**Fig. S9.** (a)-(d) Orientation factor  $\kappa^2$  (the blue series lines) and donor-acceptor distance  $r_{DA}$  (the red series lines) as a function of the time span for Models 1-4.

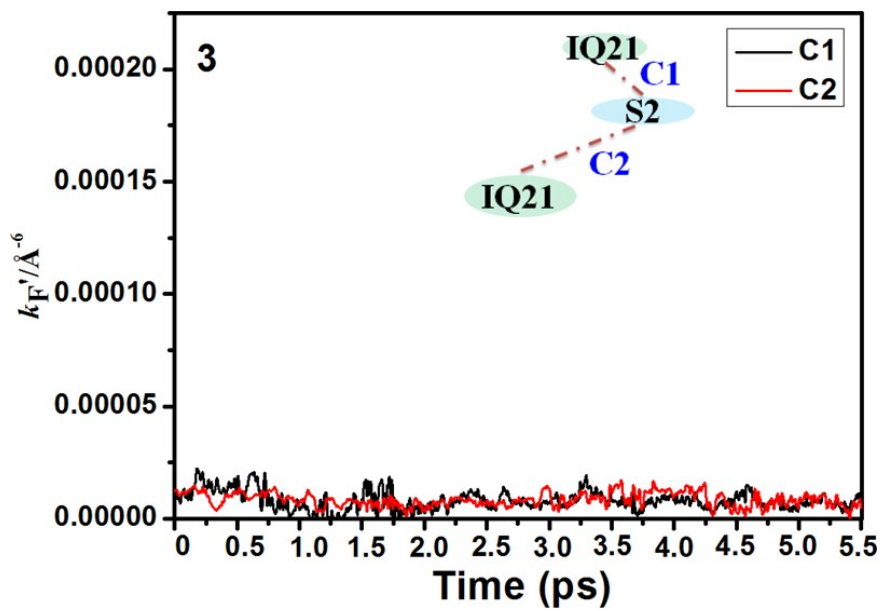

(a)

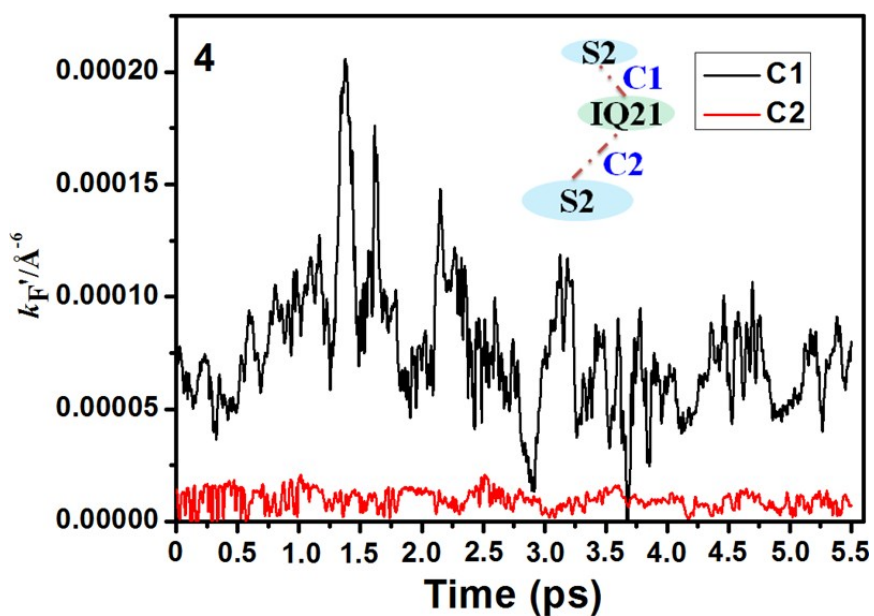

(b)

**Fig. S10.** The scaled FRET rate  $k_F'$  of varied D-A couples (a) for Model 3 and (b) for Model 4 (Cn defines the number of donor-acceptor couple, and the relative alignments between IQ21 and S2 are abstracted from the Fig. S6).

## Tables

**Table S1.** The data (vertical excited state/wavelength) calculated by different functionals of IQ21 and S2 in CH<sub>2</sub>Cl<sub>2</sub> solution.

| Functionals | B3LYP    | CAM-B3LYP | MPW1K    | Exp. <sup>a</sup> |
|-------------|----------|-----------|----------|-------------------|
| IQ21        | 1.73/715 | 2.35/528  | 2.24/553 | 2.23/557          |
| S2          | 1.77/699 | 2.52/492  | 2.38/522 | 2.59/478          |

<sup>a</sup> Experimental values measured in CH<sub>2</sub>Cl<sub>2</sub> solution from ref. 40.



**Table S2.** The distances between the O atom of carboxyl of adsorbent and Ti atom on the surface (unit in Å).

| Model    | Dye       |           |           | Co-sensitizer |           |           |
|----------|-----------|-----------|-----------|---------------|-----------|-----------|
|          | IQ21      |           |           | S2            |           |           |
| <b>1</b> | 2.21/3.50 | 2.13/2.15 | 2.14/3.14 | 2.02/2.90     |           |           |
| <b>2</b> | 2.11/2.02 |           |           | 2.02/2.11     | 2.04/2.11 | 2.02/2.16 |

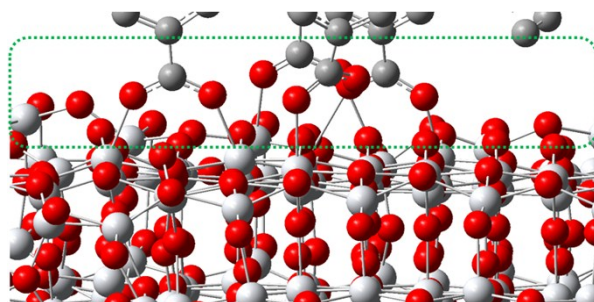

Model 1

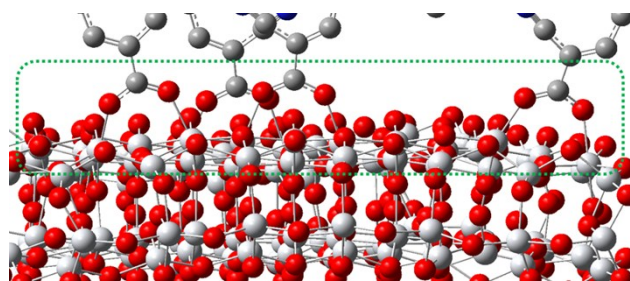

Model 2

**Table S3.** Adsorption density  $\rho(\text{IQ21})$ ,  $\rho(\text{S2})$ , and adsorption energy  $E_{\text{ads}}(\text{IQ21})$ ,  $E_{\text{ads}}(\text{S2})$  in Models **3** and **4**, respectively.

| Model    | Adsorption density/mol m <sup>-2</sup> |                       | $E_{\text{ads}}/\text{eV}$    |                             |
|----------|----------------------------------------|-----------------------|-------------------------------|-----------------------------|
|          | $\rho(\text{IQ21})$                    | $\rho(\text{S2})$     | $E_{\text{ads}}(\text{IQ21})$ | $E_{\text{ads}}(\text{S2})$ |
| <b>3</b> | $6.08 \times 10^{-7}$                  | $3.04 \times 10^{-7}$ | -5.70, -3.80                  | -6.89                       |
| <b>4</b> | $3.04 \times 10^{-7}$                  | $6.08 \times 10^{-7}$ | -8.65                         | -4.53, -5.21                |

**Table S4.** The parameters of surface dipole concentration  $N_s$  (unit  $\text{m}^{-2}$ ) and the magnitude of surface potential change  $\Delta V$  (unit eV) for IQ21 and S2 in Models **3** and **4**.

| Model    | $N_s(\text{IQ21})$   | $N_s(\text{S2})$     | $\Delta V(\text{IQ21})$ | $\Delta V(\text{S2})$ |
|----------|----------------------|----------------------|-------------------------|-----------------------|
| <b>3</b> | $0.4 \times 10^{18}$ | $0.2 \times 10^{18}$ | 0.15                    | 0.10                  |
| <b>4</b> | $0.2 \times 10^{18}$ | $0.4 \times 10^{18}$ | 0.08                    | 0.10                  |

**Table S5.** Electron injection and electron-hole recombination rate constant, as well as electron injection efficiency in Models **3** and **4**.

| Model    | $k_{inj}/s^{-1}$<br>(IQ21) | $k_{inj}/s^{-1}$<br>(S2) | $k_{rec}/s^{-1}$<br>(IQ21) | $k_{rec}/s^{-1}$<br>(S2) | $k_{inj}'/s^{-1}$     | $k_{rec}'/s^{-1}$     | $\eta_{inj}'$ |
|----------|----------------------------|--------------------------|----------------------------|--------------------------|-----------------------|-----------------------|---------------|
| <b>3</b> | $11.4 \times 10^{15}$      | $18.8 \times 10^{15}$    | $3.1 \times 10^{15}$       | $11.4 \times 10^{15}$    | $67.0 \times 10^{15}$ | $35.4 \times 10^{15}$ | 0.65          |
|          | $36.8 \times 10^{15}$      |                          | $20.8 \times 10^{15}$      |                          |                       |                       |               |
| <b>4</b> | $34.3 \times 10^{15}$      | $18.6 \times 10^{15}$    | $1.8 \times 10^{15}$       | $4.4 \times 10^{15}$     | $72.4 \times 10^{15}$ | $14.9 \times 10^{15}$ | 0.83          |
|          |                            | $19.5 \times 10^{15}$    |                            | $8.6 \times 10^{15}$     |                       |                       |               |

**Table S6.** FRET geometrical parameters of  $\kappa^2$  and  $r_{DA}$  and the average  $k_F'$  for Models **3** and **4**.

| Model    | D-A couple(s) | $\kappa^2$ | $r_{DA}/\text{\AA}$ | $k_F' \times 10^6 (\text{\AA}^{-6})$ |
|----------|---------------|------------|---------------------|--------------------------------------|
| <b>3</b> | C1            | 0.47       | 6.26                | 8.11                                 |
|          | C2            | 0.69       | 6.61                | 8.44                                 |
| <b>4</b> | C1            | 0.78       | 4.71                | 75.28                                |
|          | C2            | 0.63       | 6.35                | 9.73                                 |

## References

1. V. Dryza and E. J. Bieske, *J. Phys. Chem. C*, 2014, **118**, 19646-19654.
2. H. Wang, B. Yue, Z. Xie, B. Gao, Y. Xu, L. Liu, H. Sun and Y. Ma, *Phys. Chem. Chem. Phys.*, 2013, **15**, 3527-3534.
3. M. Pastore and F. De Angelis, *J. Phys. Chem. Lett.*, 2012, **3**, 2146-2153.
4. P. Persson, M. J. Lundqvist, R. Ernstorfer, W. A. Goddard and F. Willig, *J. Chem. Theory Comput.*, 2006, **2**, 441-451.
5. J. Preat, *J. Phys. Chem. C*, 2010, **114**, 16716-16725.
6. J. Li, H. Wang, P. Persson and M. Thoss, *J. Chem. Phys.*, 2012, **137**, 22A529.
